# Supplementary material for: Identification of stromal microenvironment characteristics and key molecular mining in pancreatic cancer
Source: Research Square preprint supplement (doi:10.21203/rs.3.rs-1632849/v2), 2022-06-02
Supplement: Supplementary file 1 [file f577e2f789b7a3082eab303c.xlsx]

## Sheet: Talbe S1. Limme resul of type 2
表格 1
SYMBOL	logFC	AveExpr	t	P.Value	adj.P.Val	B
COL17A1	2.60879	5.77255	6.54522	6.34924e-10	2.92978e-07	12.2861
KRT17	2.02443	8.21384	5.22758	4.85555e-07	2.21388e-05	5.99995
COL10A1	1.97083	6.43919	5.62404	7.26791e-08	6.0029e-06	7.792
MARCO	1.88688	4.03697	5.2178	5.08276e-07	2.29099e-05	5.95689
TMPRSS4	1.84396	5.56901	4.82114	3.08682e-06	8.07647e-05	4.26193
MMP11	1.74985	7.63673	6.064	7.97401e-09	1.43345e-06	9.88404
GPRC5A	1.74624	7.2106	5.12698	7.74774e-07	3.06698e-05	5.56011
ELAPOR1	-1.72428	4.33565	-5.79566	3.10746e-08	3.44073e-06	8.5956
LAMB3	1.70137	8.09422	5.98893	1.17108e-08	1.82593e-06	9.51977
LAMC2	1.68773	7.85549	6.55201	6.12153e-10	2.92978e-07	12.3209
KRT7	1.59402	8.57969	5.04536	1.12679e-06	4.04163e-05	5.20789
GJB2	1.57852	6.22014	5.15089	6.93707e-07	2.80419e-05	5.6641
AREG	1.54357	5.35482	6.64033	3.80052e-10	2.23354e-07	12.774
AHNAK2	1.5373	4.27042	5.57743	9.12887e-08	6.80435e-06	7.57657
KLHL32	-1.52916	-1.13252	-5.82814	2.64107e-08	3.08057e-06	8.74952
CLIC3	1.51696	5.34308	4.9009	2.16465e-06	6.34854e-05	4.59475
TREM1	1.5085	2.36334	6.18475	4.27151e-09	9.06508e-07	10.476
IL1RN	1.49665	5.23876	5.70685	4.83319e-08	4.55871e-06	8.17771
WNT10A	1.49527	2.87213	5.47875	1.47319e-07	9.67527e-06	7.12459
IL20RB	1.4768	2.37243	5.20069	5.50481e-07	2.41013e-05	5.88178
CDA	1.47	5.36653	6.41132	1.29835e-09	4.40861e-07	11.6065
CALB2	1.4678	3.76936	4.91703	2.01377e-06	6.05715e-05	4.66255
CRYBG2	1.45116	3.11875	5.93563	1.53576e-08	2.11367e-06	9.26292
OLR1	1.44339	4.44189	4.96473	1.62478e-06	5.17221e-05	4.86404
POSTN	1.42639	7.60894	6.11297	6.19611e-09	1.17388e-06	10.1232
SEMA7A	1.42274	5.08019	6.5355	6.68947e-10	2.92978e-07	12.2365
SLC2A1	1.41604	7.0671	7.02682	4.53095e-11	6.86384e-08	14.7975
FN1	1.41132	8.92792	6.32886	2.00858e-09	5.69735e-07	11.1921
CDH3	1.40333	5.26868	6.16633	4.7005e-09	9.48253e-07	10.3852
INHBA	1.40173	5.11326	6.25367	2.98139e-09	7.41923e-07	10.8172

## Sheet: Table S2. Coefficients of PECMS
表格 1
Coef	MIn MSE		1SE MSE
1	COL17A1	0.0357276	COL17A1	0.0100818
2	MARCO	0.000977961	AREG	0.0220009
3	GPRC5A	-0.00751081	KLHL32	-0.00790382
4	LAMC2	0.0164681	CDA	0.00911738
5	GJB2	-0.0336104	POSTN	0.0167919
6	AREG	0.0483961	SLC2A1	0.0408528
7	AHNAK2	-0.0422603	FN1	0.00533976
8	KLHL32	-0.0355219	INHBA	0.0131437
9	CLIC3	-0.0065446
10	WNT10A	0.0197988
11	CDA	0.0135114
12	POSTN	0.0348531
13	SEMA7A	0.0019286
14	SLC2A1	0.0593791
15	FN1	0.0287498
16	CDH3	-0.000101951
17	INHBA	0.0293481
Intercept	(Intercept)	-3.07275	(Intercept)	-1.75536

## Sheet: Table S3. Metabolism genes (gen
表格 1
	Glycolysis	Tricarboxylic Acid Cycle	ATPase (Resp. Complex V)	Fatty Acid Synthesis	Beta-oxidation (FA breakdown)	Glutaminolysis	Pentose Phosphate Pathway	Monocarboxylic Acid Transport
1	3098	8050	498	47	34	2744	2539	162515
2	3099	5160	506	4199	37	27165	9563	9120
3	3101	5162	509	4200	35	2746	25796	220963
4	2645	54704	513	10873	33	2747	5226	201232
5	2821	57546	514	84532	28976	2875	22934	151473
6	5213	1431	515	55902	36	2805	6120	682
7	5214	48	516	31	27034	2806	729020	6566
8	5211	50	517	32	3030		7086	9123
9	5207	3417	518	2194	3032		8277	6567
10	5208	3418	10476	64834	3033		84076	9121
11	5209	3419	521	54898	1892		6888	9194
12	5210	3421	522	83401	1962			387700
13	226	3420	9551	6785	1632			23539
14	229	4967	10632	60481	10455
15	230	8803	539	79071	3028
16	7167	8801	27109	79993	30
17	2597	8802		6319	10449
18	26330	2271		79966	38
19	5230	4190		3992
20	5232	4191		9415
21	5223			3995
22	5224
23	441531
24	669
25	2023
26	2026
27	2027
28	5313
29	5315
30	3939
31	3945
32	6513
33	6514
34	6515
35	6517
36	6518

## Sheet: Table S4. Immune genes
表格 1
entrez	Cluster name
51225	Cytotoxic effector functions
9447	Cytotoxic effector functions
241	Cytotoxic effector functions
91526	Immune response
257106	Cytotoxic effector functions
397	Cytotoxic effector functions
64919	Cytotoxic effector functions
128346	Cytotoxic effector functions
712	Cytotoxic effector functions
713	Cytotoxic effector functions
714	Cytotoxic effector functions
719	Cytotoxic effector functions
6351	Cytotoxic effector functions
1234	Cytotoxic effector functions
920	Cytotoxic effector functions
959	Cytotoxic effector functions
1043	Cytotoxic effector functions
963	Cytotoxic effector functions
924	Cytotoxic effector functions
972	Cytotoxic effector functions
941	Cytotoxic effector functions
942	Cytotoxic effector functions
11151	Cytotoxic effector functions
56253	Cytotoxic effector functions
1439	Cytotoxic effector functions
8530	Cytotoxic effector functions
1521	Immune response
80231	Cytotoxic effector functions
8320	Cytotoxic effector functions
100131897	Cytotoxic effector functions
2214	Cytotoxic effector functions
115350	Cytotoxic effector functions
83416	Cytotoxic effector functions
83706	Cytotoxic effector functions
2359	Cytotoxic effector functions
2533	Cytotoxic effector functions
139716	Cytotoxic effector functions
2672	Cytotoxic effector functions
55303	Cytotoxic effector functions
474344	Cytotoxic effector functions
168537	Cytotoxic effector functions
9535	Cytotoxic effector functions
8477	Cytotoxic effector functions
3001	Cytotoxic effector functions
3002	Cytotoxic effector functions
2999	Cytotoxic effector functions
84868	Cytotoxic effector functions
10870	Cytotoxic effector functions
3594	Cytotoxic effector functions
50615	Cytotoxic effector functions
3676	Cytotoxic effector functions
3684	Cytotoxic effector functions
3687	Cytotoxic effector functions
3689	Cytotoxic effector functions
8514	Cytotoxic effector functions
3903	Cytotoxic effector functions
7805	Cytotoxic effector functions
54900	Cytotoxic effector functions
3932	Cytotoxic effector functions
3937	Cytotoxic effector functions
10859	Cytotoxic effector functions
11006	Cytotoxic effector functions
7940	Cytotoxic effector functions
4069	Cytotoxic effector functions
219972	Cytotoxic effector functions
931	Cytotoxic effector functions
64231	Cytotoxic effector functions
4481	Cytotoxic effector functions
64005	Cytotoxic effector functions
4689	Cytotoxic effector functions
3071	Cytotoxic effector functions
84166	Cytotoxic effector functions
80896	Cytotoxic effector functions
80380	Cytotoxic effector functions
23533	Cytotoxic effector functions
5330	Cytotoxic effector functions
5341	Cytotoxic effector functions
5450	Cytotoxic effector functions
5788	Cytotoxic effector functions
399	Cytotoxic effector functions
6039	Cytotoxic effector functions
54440	Cytotoxic effector functions
256380	Cytotoxic effector functions
6402	Cytotoxic effector functions
6404	Cytotoxic effector functions
100049587	Cytotoxic effector functions
55423	Cytotoxic effector functions
6503	Cytotoxic effector functions
84174	Cytotoxic effector functions
56833	Cytotoxic effector functions
219855	Cytotoxic effector functions
6688	Cytotoxic effector functions
26228	Cytotoxic effector functions
9840	Cytotoxic effector functions
22797	Cytotoxic effector functions
201633	Cytotoxic effector functions
10333	Cytotoxic effector functions
445347	Cytotoxic effector functions
7305	Cytotoxic effector functions
7456	Cytotoxic effector functions
257101	Cytotoxic effector functions
221188	Cytotoxic effector functions
116986	Immune response
80709	Immune response
54470	Metabolism
460	Neuroendocrine-like
282991	Metabolism
55589	Antigen Presentation
652	TGFbeta-Stromal activity
146562	Neuroendocrine-like
1236	Cytotoxic effector functions
51816	Cytotoxic effector functions
80790	Immune response
10663	Immune response
9267	Cytotoxic effector functions
151636	Antigen Presentation
55840	Cytotoxic effector functions
1945	Metabolism
2191	TGFbeta-Stromal activity
2395	Neuroendocrine-like
3112	Antigen Presentation
3385	Immune response
3601	Antigen Presentation
3624	TGFbeta-Stromal activity
3718	Immune response
152789	Immune response
3822	Immune response
474354	Cytotoxic effector functions
347731	Neuroendocrine-like
64780	Immune response
4599	Antigen Presentation
197358	Immune response
347736	Neuroendocrine-like
64127	Antigen Presentation
50863	TGFbeta-Stromal activity
53829	Cytotoxic effector functions
64761	Antigen Presentation
10154	Immune response
80863	Neuroendocrine-like
5699	Antigen Presentation
8643	Neuroendocrine-like
57333	TGFbeta-Stromal activity
8737	Antigen Presentation
54809	Antigen Presentation
8671	Neuroendocrine-like
6892	Antigen Presentation
6999	TGFbeta-Stromal activity
943	TGFbeta-Stromal activity
9830	Antigen Presentation
54659	Metabolism
54579	Metabolism
54578	Metabolism
285175	Neuroendocrine-like
8875	Cytotoxic effector functions
196740	Neuroendocrine-like
219654	TGFbeta-Stromal activity
57643	Neuroendocrine-like

## Sheet: Table S5. Clinical data
表格 1
ID	SEX(1=male, 2=female)	SURG_TIME	AGE_AT_DIAGNOSIS	PATHOLOGY	STAGE	REC_TIME	LAST_FOLLOW_UP	OS	First line therapy	BEST_RESPONSE	LAST_STATUS
PANEC_01	1	201807	63	PADC	AJCC pT2N2	202001	202010	27	AG	SD	1
PANEC_02	0	201809	74	PADC	AJCC pT2N0	201904	201908	12	AG	PD	1
PANEC_03	1	201811	42	PADC	AJCC pT3N0	201811	201902	3	AG	PD	0
PANEC_04	0	201809	68	PADC	AJCC pT2N0	201902	202001	16	AG	SD	1
PANEC_05	1	201801	47	PADC	AJCC pT2N0	201903	201912	23	AG	SD	1
PANEC_06	0	201809	48	PADC	AJCC pT2N1	201906	202004	19	AG	PD	1
PANEC_07	1	201802	31	PADC	AJCC pT3N0		201901	11	AG	SD	1
PANEC_08	1	201802	68	PADC	AJCC pT3N0	201803	201807	5	AG	SD	1
PANEC_09	1	201801	64	PADC	AJCC pT2N1	201802	201807	6	AG	PR	1
PANEC_10	1	201806	68	PADC	AJCC pT2N0	201901	201907	13	AG	SD	1
PANEC_11	0	201808	60	PADC	AJCC pT2N2	201912	202101	29	AG	SD	1
PANEC_12	0	201810	65	PADC	AJCC pT2N1	201907	202003	17	AG	SD	1
PANEC_13	0	201810	55	PADC	AJCC pT1cN0	201906	202005	17	AG	PR	1
PANEC_14	0	201807	66	PADC	AJCC pT1cN0	201904	201908	13	AG	PD	1
PANEC_15	1	201809	69	PADC	AJCC pT3N0	201905	201910	13	AG	SD	1
PANEC_16	1	201808	49	PADC	AJCC pT2N0	201910	202006	22	AG	SD	1
PANEC_17	1	201808	65	PADC	AJCC（2017)pT3N0		201906	10	AG	SD	1
PANEC_18	0	201801	48	PADC	AJCC pT3N0	201907	202009	23	AG	PR	1
PANEC_19	1	201808	52	PADC	AJCC（2017)pT2N1	202103	202106	34	AG	SD	0
PANEC_20	1	201809	45	PADC	AJCC pT2N1	201902	201904	7	AG	PD	1
